# Supplementary material for: In silico mining of microsatellites from the Phlebotomus argentipes (Diptera: Psychodidae) scaffold-level genome assembly and validation of eleven genotyping markers
Source: Research Square preprint supplement (doi:10.21203/rs.3.rs-9513723/v1), 2026-06-08
Supplement: Supplementary file 1 [file 05019c39559d7a00c90c1e9c.docx]

**Supplementary Table S5. Different trinucleotide simple sequence repeats motif classes.**

| **Motif Class** | **Number of Motifs** | **Percentage (%)** |
| --- | --- | --- |
| 1. AAC/CAA/TTG/TGT/GTT | 8 | 3.4 |
| 2. AAG/AGA/GAA/TTC/TCT/CTT | 37 | 15.6 |
| 3. AAT/ATA/TAA/TTA/TAT/ATT | 79 | 33.3 |
| 4. CCA/CAC | 3 | 1.3 |
| 5. TGA/GAT/ATG/TCA/ATC/CAT | 35 | 14.8 |
| 6. AGC/GCA/CAG/TCG/GTC/GAC/GCT/TGC/CTG | 25 | 10.6 |
| 7. AGG/GGA/GAG/TCC/CTC | 27 | 11.4 |
| 8. CCG/CGC/GCC/GGC/CGG | 23 | 5.7 |
