# Supplementary material for: In silico mining of microsatellites from the Phlebotomus argentipes (Diptera: Psychodidae) scaffold-level genome assembly and validation of eleven genotyping markers
Source: Research Square preprint supplement (doi:10.21203/rs.3.rs-9513723/v1), 2026-06-08
Supplement: Supplementary file 2 [file 067c003b8bc29072ecf883c3.docx]

**Supplementary Table S3. Different types of simple sequence repeats with the longest array length.**

| **Type of SSR** | **SSR motif** | **Array length** |
| --- | --- | --- |
| Mono- SSR | A(23) | 23 |
| Di- SSR | AG(52) | 104 |
| Tri- SSR | TAT(29) | 87 |
| Tetra- SSR | AATA(9) | 36 |
| Penta- SSR | AGAAA(6) | 30 |
| Hexa- SSR | TGGGGG(5) | 30 |
