# Supplementary material for: In silico mining of microsatellites from the Phlebotomus argentipes (Diptera: Psychodidae) scaffold-level genome assembly and validation of eleven genotyping markers
Source: Research Square preprint supplement (doi:10.21203/rs.3.rs-9513723/v1), 2026-06-08
Supplement: Supplementary file 3 [file 1c83026a7edf81a76a8899b0.docx]

**Supplementary Table S4. Different dinucleotide simple sequence repeats motif classes.**

| **Motif Class** | **Number of Motifs** | **Percentage (%)** |
| --- | --- | --- |
| 1. AT/TA | 229 | 12.63 |
| 2. AC/TG/CA/GT | 436 | 24.05 |
| 3. AG/TC/GA/CT | 1148 | 63.32 |
| 4. CG/GC | 0 | 0 |
