# Supplementary material for: In silico mining of microsatellites from the Phlebotomus argentipes (Diptera: Psychodidae) scaffold-level genome assembly and validation of eleven genotyping markers
Source: Research Square preprint supplement (doi:10.21203/rs.3.rs-9513723/v1), 2026-06-08
Supplement: Supplementary file 4 [file 3db324c57fac2d118a07c178.pdf]

**>BankIt3073521\_PagSSRIS18\_PZ269930**

TTGTA AACGACG GCCAGTGAATTGTAATACGACTCACTATAGGGCGAATTGGGCCCGAC  
GTCGCATGCTCCCGGCCGCCATGGCGGCCGCGGAATTCGATTGGAAGATCTGGGTGATT  
GGACTAAAAATATCTCCTTCGCAATTA ACTCTCCCGGAGGAGGAGGAGGAGGAGGAGAAA  
CATATGTACGACATTATGAATGAGGCTGCAAGACAATCTCAATCACTAGTGAATTCGCGG  
CCGCCTGCAGGTGACCATATGGGAGAGCTCCCAACGCGTTGGATGCATAGCTTGAGTAT  
TCTATAG

**>BankIt3073583\_PagSSRIC07\_PZ269931**

GAAACATTACAACGGCCGCGGTGCCCGACAATGCAAAGGTAGAATAATCAAACCCCTT  
TAAAAGGGGGATTTTGGCACCGGCCGAGGAAA ACTCCAGGTCCATAACAAAAATAAAAA  
AAAAATAGGAAACAAAACGAGATATCGGTGCATCAGTCGGACAAGAAGAGCTTATAGTGC  
GTTACCGGGTAGATCTGATAGGACCAGACCACTACTTTCATCAATTAGAATGGGATGATC  
AAAGACCAATAAAAACGGTATTTCACAACTGTGAACTTCAATTA ACTACGCTCTTTCTGTA  
CACCCCGGGCCTCCTCCTTCTCCCTCCGCTTACTATCCGAGGAGGAGGAGGAGGAGGAG  
GAGGAGGAGGAGGAGGACAACAGGACGAGGCAATTCCTGGCCGAAGAAGGTGTGCT

**>BankIt3073592\_PagSSRIC02\_PZ269932**

ATTGAAGGGTATTCAAGGGTCATTAAGTCGGGAAGTCACATTCTATGAACTTCAATAAAG  
ATCAGCCACTCGCCAGGACAGACAAAACGAGAAAGACGTGTTATCAGCATCAGCCTCTTG  
CCATGAACTTTGACCTCGTGGATTCGCTCCTCCTCCTCCTCATCTTCTCCTTCTGCG  
CCAGAGCTTCTTCGGGAGTATTTACTTTATCTCCTTTTCAATGGCCTTATTATCATCGT  
CGTGTGGAT

**>BankIt3073599\_PagSSRIC08\_PZ269933**

CCCCGTGTGTGTGTGTGTGTGTGTGGATGTGAGGGCAAAAATTTGTCGAAATGATAAACG  
ATGCCATCCATATTTTATGTACACCACATACATATATATATGTGTGTATATTTTTGGGGG  
GCAGCAAAAAAACAGCCGATGATCCATTGAGAATCGAAGCAACATCTCCTGGATATCAC  
TCGCGCGGTTAGCCACATACTTGTCCACTTCTTCGGTGA ACTCTGAATCCACTGGAGAG  
CGACCATGGAATCAGTCCACGCGTACATTTTCACTCCTTGTGATGATCGCTCCTTTCA  
CCCTGTCCAGGAGCTCCGCCAGGAGAAGACAGCCGAGAATCCATTGAGACGGAAAAATAA



A

**>BankIt3073820\_PagSSRIC21\_PZ269938**

TGAGTAGAAGAGGGACATATAAGAGTCCCCCCCAGACTGTGTGTGTGTGTGTGTGTTTT  
TCCCCTCAGGGGAGAAAAGAGGGTGCGGGAAAAGACAAGAAGACTCAGAATTGAATACATTG  
TTTGACACGGAAGTATAATGCTGCATCGCTT

**>BankIt3073820\_PagSSRIC27\_PZ269939**

CCCTCGACTGGGGGTGATACTTTCAACCCTCCCTCCCACACCACCCACACACACACATA  
ATCTGAAATACATGTATAACTAATATCTAACAATCACTGGGTGGAAAATGTCACAGAAAA  
CTTTTCCCACAATCCTCAGCATCACGTT

**>BankIt3073820\_PagSSRIC50\_PZ269940**

AGGAGAACGGGGTATTCCTGCATCCAGGACATTTCTTCCACCGCTCACACAATCCCTTTT  
TTCGCCTCTCTCTCCCTCTCTCTCTCTCTAGCTTCTGGACGAAGGAAGAAGATATG  
AAAGAGGCGCGCCGAAAAAAGGCTCGCACAGGGACCACTTCCATCAATGTCCCAA
