# Supplementary material for: In silico mining of microsatellites from the Phlebotomus argentipes (Diptera: Psychodidae) scaffold-level genome assembly and validation of eleven genotyping markers
Source: Research Square preprint supplement (doi:10.21203/rs.3.rs-9513723/v1), 2026-06-08
Supplement: Supplementary file 5 [file 6c8b34e3a84cbd9641875035.docx]

**Table 1. Polymorphism characteristics of experimentally validated SSR markers in *Phlebotomus argentipes* isolate in two geographical locations (Ambalantota (Geo location 1) and Polpithigama (Geo location 2), Sri Lanka**

| **Locus**  **name** | **NCBI Accession** | **No. of alleles (Geo 1)** | **No. of alleles (Geo 2)** | **Ho** | **He** | **FIS** | **FST** | **PIC** |
| --- | --- | --- | --- | --- | --- | --- | --- | --- |
| IC07 | PZ269930 | 7 | 6 | 0.43 | 0.73 | 0.41 | 0.05 | 0.69 |
| IC02 | PZ269931 | 7 | 7 | 0.45 | 0.72 | 0.38 | 0.03 | 0.68 |
| IS18 | PZ269932 | 4 | 5 | 0.40 | 0.58 | 0.31 | 0.06 | 0.52 |
| IC75 | PZ269933 | 4 | 4 | 0.20 | 0.29 | 0.31 | 0.04 | 0.26 |
| IC08 | PZ269934 | 2 | 1 | 0.00 | 0.44 | 1.00 | 0.10 | 0.33 |
| IC21 | PZ269935 | 4 | 3 | 0.75 | 0.66 | -0.14 | 0.05 | 0.61 |
| IC27 | PZ269936 | 6 | 8 | 0.60 | 0.85 | 0.29 | 0.04 | 0.81 |
| IC50 | PZ269937 | 3 | 4 | 0.50 | 0.63 | 0.21 | 0.05 | 0.57 |
| IC51 | PZ269938 | 6 | 7 | 0.57 | 0.82 | 0.30 | 0.04 | 0.79 |
| IC68 | PZ269939 | 4 | 5 | 0.67 | 0.83 | 0.19 | 0.05 | 0.81 |
| IC74 | PZ269940 | 4 | 5 | 0.70 | 0.78 | 0.10 | 0.04 | 0.75 |

H0: Observed heterozygosity, He: Expected heterozygosity, FIS: Fixation Index within subpopulations, FIT: Fixation Index among subpopulations, PIC: Polymorphism information content
