# Supplementary material for: In silico mining of microsatellites from the Phlebotomus argentipes (Diptera: Psychodidae) scaffold-level genome assembly and validation of eleven genotyping markers
Source: Research Square preprint supplement (doi:10.21203/rs.3.rs-9513723/v1), 2026-06-08
Supplement: Supplementary file 6 [file 724f8a42fd03f079cbd034ae.docx]

**Supplementary Table S2. Frequency of different types of simple sequence repeats**

| **Nucleotide array length class** | **Number of SSRs** | | | | | | | **Total SSR percentage (%)** |
| --- | --- | --- | --- | --- | --- | --- | --- | --- |
| **Mono-SSR** | **Di-SSR** | **Tri-SSR** | **Tetra-SSR** | **Penta-SSR** | **Hexa-SSR** | **Total SSRs** |
| 10-20 | 3025 | 713 | - | 68 | - | - | 3806 | 73.60 |
| 21-30 | 2 | 915 | 217 | 17 | 8 | 2 | 1161 | 22.40 |
| 31-40 | - | 132 | 13 | 1 | - | - | 146 | 2.80 |
| 41-50 | - | 34 | 2 | - | - | - | 36 | 0.70 |
| 51-60 | - | 13 | 2 | - | - | - | 15 | 0.30 |
| 61-70 | - | 4 | 2 | - | - | - | 6 | 0.10 |
| 71-80 | - | 1 | 0 | - | - | - | 1 | 0.02 |
| 81-90 | - | 0 | 1 | - | - | - | 1 | 0.02 |
| 91-100 | - | 0 | 0 | - | - | - | 0 | 0 |
| 101-110 | - | 1 | - | - | - | - | 1 | 0.02 |
