# Supplementary material for: In silico mining of microsatellites from the Phlebotomus argentipes (Diptera: Psychodidae) scaffold-level genome assembly and validation of eleven genotyping markers
Source: Research Square preprint supplement (doi:10.21203/rs.3.rs-9513723/v1), 2026-06-08
Supplement: Supplementary file 7 [file 83801098f1b8bba5ca7f1e78.docx]

**Supplementary Table S1. Simple sequence repeats identified in the 63 scaffolds.**

| **Scaffold Number** | **Contig** | **Length (bases)** | **Mono-SSR** | **Di-SSR** | **Tri-SSR** | **Tetra- SSR** | **Penta-SSR** | **Hexa- SSR** | **Total** |
| --- | --- | --- | --- | --- | --- | --- | --- | --- | --- |
| 1 | C_1 | 36399 | 0 | 0 | 0 | 0 | 0 | 0 | 0 |
| 2 | C_2 | 10610067 | 184 | 201 | 21 | 12 | 0 | 0 | 418 |
| 3 | C_3 | 74465 | 5 | 1 | 1 | 0 | 0 | 0 | 7 |
| 4 | C_5 | 13537201 | 529 | 378 | 41 | 10 | 3 | 0 | 961 |
| 5 | C_6 | 5417812 | 5 | 3 | 0 | 0 | 0 | 0 | 8 |
| 6 | C_7 | 51355 | 10 | 2 | 2 | 0 | 0 | 0 | 14 |
| 7 | C_8 | 676903 | 67 | 18 | 3 | 2 | 0 | 0 | 90 |
| 8 | C_9 | 90774 | 0 | 0 | 0 | 1 | 0 | 0 | 1 |
| 9 | C_10 | 471265 | 48 | 16 | 5 | 0 | 0 | 0 | 69 |
| 10 | C_13 | 4017 | 0 | 0 | 1 | 0 | 0 | 0 | 1 |
| 11 | C_14 | 8334 | 0 | 0 | 0 | 0 | 0 | 0 | 0 |
| 12 | C_15 | 18876359 | 241 | 319 | 39 | 16 | 2 | 1 | 618 |
| 13 | C_17 | 1347626 | 15 | 18 | 1 | 0 | 0 | 0 | 34 |
| 14 | C_20 | 102971 | 8 | 0 | 0 | 2 | 0 | 0 | 10 |
| 15 | C_21 | 491038 | 136 | 9 | 1 | 1 | 0 | 0 | 147 |
| 16 | C_22 | 603 | 0 | 0 | 0 | 0 | 0 | 0 | 0 |
| 17 | C_23 | 10051 | 5 | 0 | 0 | 0 | 0 | 0 | 5 |
| 18 | C_24 | 112561 | 40 | 1 | 2 | 0 | 0 | 0 | 43 |
| 19 | C_25 | 65453 | 13 | 2 | 0 | 0 | 0 | 0 | 15 |
| 20 | C_26 | 39573 | 7 | 0 | 0 | 0 | 0 | 0 | 7 |
| 21 | C_27 | 420875 | 30 | 8 | 1 | 0 | 0 | 0 | 39 |
| 22 | C_28 | 147079 | 37 | 2 | 0 | 0 | 0 | 0 | 39 |
| 23 | C_29 | 18372 | 1 | 0 | 1 | 0 | 0 | 0 | 2 |
| 24 | C_32 | 2674162 | 25 | 50 | 6 | 3 | 0 | 0 | 84 |
| 25 | C_33 | 1299399 | 90 | 31 | 1 | 2 | 0 | 0 | 124 |
| 26 | C_34 | 2538 | 0 | 0 | 0 | 0 | 0 | 0 | 0 |
| 27 | C_35 | 314345 | 19 | 5 | 1 | 0 | 0 | 0 | 25 |
| 28 | C_37 | 31180 | 0 | 0 | 0 | 0 | 0 | 0 | 0 |
| 29 | C_38 | 17997 | 0 | 0 | 0 | 0 | 0 | 0 | 0 |
| 30 | C_39 | 2114412 | 35 | 54 | 4 | 1 | 0 | 0 | 94 |
| 31 | C_40 | 220765 | 17 | 3 | 1 | 0 | 0 | 0 | 21 |
| 32 | C_41 | 2813 | 0 | 0 | 0 | 0 | 0 | 0 | 0 |
| 33 | C_42 | 1798930 | 180 | 46 | 7 | 0 | 0 | 0 | 233 |
| 34 | C_43 | 33631 | 0 | 0 | 0 | 0 | 0 | 0 | 0 |
| 35 | C_45 | 51819 | 5 | 0 | 0 | 0 | 0 | 0 | 5 |
| 36 | C_46 | 738332 | 71 | 32 | 4 | 0 | 0 | 0 | 107 |
| 37 | C_47 | 188455 | 17 | 2 | 1 | 0 | 0 | 0 | 20 |
| 38 | C_48 | 7600 | 1 | 0 | 0 | 0 | 0 | 0 | 1 |
| 39 | C_50 | 130466 | 10 | 1 | 0 | 0 | 0 | 0 | 11 |
| 40 | C_51 | 300649 | 90 | 9 | 4 | 0 | 0 | 0 | 103 |
| 41 | C_52 | 4755 | 1 | 0 | 0 | 0 | 0 | 0 | 1 |
| 42 | C_53 | 36892 | 9 | 0 | 1 | 0 | 0 | 0 | 10 |
| 43 | C_54 | 72014 | 7 | 1 | 0 | 0 | 0 | 0 | 8 |
| 44 | C_55 | 4081 | 6 | 0 | 0 | 0 | 0 | 0 | 6 |
| 45 | C_58 | 250299 | 52 | 16 | 1 | 0 | 0 | 0 | 69 |
| 46 | C_59 | 114711 | 9 | 2 | 1 | 0 | 0 | 0 | 12 |
| 47 | C_60 | 1854 | 0 | 0 | 0 | 0 | 0 | 0 | 0 |
| 48 | C_61 | 80443 | 6 | 2 | 0 | 0 | 0 | 0 | 8 |
| 49 | C_65 | 8462 | 1 | 0 | 0 | 0 | 0 | 0 | 1 |
| 50 | C_66 | 40640 | 4 | 2 | 0 | 0 | 0 | 0 | 6 |
| 51 | C_67 | 2065 | 0 | 0 | 0 | 0 | 0 | 0 | 0 |
| 52 | C_68 | 129143 | 10 | 5 | 0 | 0 | 0 | 0 | 15 |
| 53 | C_69 | 22878 | 0 | 0 | 0 | 0 | 0 | 0 | 0 |
| 54 | C_71 | 21246 | 3 | 0 | 0 | 0 | 0 | 0 | 3 |
| 55 | C_72 | 15376 | 2 | 0 | 0 | 0 | 0 | 0 | 2 |
| 56 | C_74 | 35940 | 8 | 5 | 0 | 0 | 0 | 0 | 13 |
| 57 | C_75 | 1687302 | 285 | 70 | 13 | 7 | 2 | 0 | 377 |
| 58 | C_77 | 37280 | 6 | 1 | 0 | 1 | 0 | 0 | 8 |
| 59 | C_80 | 4602 | 0 | 0 | 0 | 0 | 0 | 0 | 0 |
| 60 | C_81 | 38606 | 3 | 0 | 0 | 0 | 0 | 0 | 3 |
| 61 | C_82 | 689 | 0 | 0 | 0 | 0 | 0 | 0 | 0 |
| 62 | Sc_4 | 13784943 | 360 | 217 | 38 | 21 | 0 | 0 | 636 |
| 63 | Sc_18 | 18667202 | 314 | 281 | 35 | 7 | 1 | 1 | 639 |
| Total | | | 3027 | 1813 | 237 | 86 | 8 | 2 | 5173 |
| Percentage (%) | | | 58.5 | 35.1 | 4.6 | 1.7 | 0.15 | 0.04 |  |
| SSR density (Number of SSRs per Mb of genomic sequence) | | | 31.3 | 18.8 | 2.45 | 0.89 | 0.08 | 0.02 |  |

C, Contig; Sc, Scaffold.
