# Supplementary material for: In silico mining of microsatellites from the Phlebotomus argentipes (Diptera: Psychodidae) scaffold-level genome assembly and validation of eleven genotyping markers
Source: Research Square preprint supplement (doi:10.21203/rs.3.rs-9513723/v1), 2026-06-08
Supplement: Supplementary file 8 [file f4ef2570f7847d502a90bd60.docx]

**Supplementary Table S6. Different tetranucleotide simple sequence repeats motif classes.**

| **Motif Class** | **Number of Motifs** | **Percentage (%)** |
| --- | --- | --- |
| 1. AAAG/TTTC/AGAA/TCTT/GAAA/CTTT/AAGA | 25 | 29.1 |
| 2. AAAC/TTTG/ACAA/CAAA | 7 | 8.1 |
| 3. AAAT/TTTA/AATA/TTAT/TATT/ATTT | 18 | 21.0 |
| 4. ATAG/TATC/TAGA/AGAT | 6 | 7.0 |
| 5. AATG/ATTC/TTCA | 5 | 5.8 |
| 6. AGAC | 2 | 2.3 |
| 7. GAAG/GGAA/TTCC/AGGA | 6 | 7.0 |
| 8. GACG | 2 | 2.3 |
| 9. GGGA/GGAG/GAGG | 4 | 4.7 |
| 10. AATT/TAAT | 2 | 2.3 |
| 11. AGTT/ATCA/CAAT | 3 | 3.5 |
| 12. TACA/TGTA | 2 | 2.3 |
| 13. GTCG | 1 | 1.2 |
| 14. GTGC | 1 | 1.2 |
| 15. CTCG | 1 | 1.2 |
| 16. GAGT | 1 | 1.2 |
