# Supplementary material for: In silico mining of microsatellites from the Phlebotomus argentipes (Diptera: Psychodidae) scaffold-level genome assembly and validation of eleven genotyping markers
Source: Research Square preprint supplement (doi:10.21203/rs.3.rs-9513723/v1), 2026-06-08
Supplement: Supplementary file 9 [file fd0967e6f2d1e20dbd591471.docx]

**Table 2. Primers designed to amplify the selected SSRs, including the SSR, product size, forward and reverse primer sequences and annealing temperature (Tm).**

| **No.** | **Scaffold/Contig** | **Primer sequence (5'–3')** | **Repeat motifs found in**  ***in silico***  **mining (n)** | **Product size (bp)** | **Repeat motifs found in**  ***in vitro* PCRs (n)** | **PCR annealing T/°C** |
| --- | --- | --- | --- | --- | --- | --- |
| 1 | IC03 | F-CCCGAGTGCCACAAGTAAAT  R-GTTGAGGCTGTGGTGAATGA | (TAA)11 | 238 | (TAA)11 | 56.1 |
| 2 | IC07 | F-CTTATGATTTGCCCCTTG  R-GTGTGGGAATTGATTACACC | (GAG)12 | 179 | (GAG)12 | 49.0 |
| 3 | IC02 | F-ATCAGCCTCTTGCCATGAAC  R-GTGAAATCCACACGACGATG | (CTC)10 | 158 | (CTC)4 | 52.2 |
| 4 | IC15 | F-AAAGTACGTGTGGAAGGGAGTG  R-GGCACAAACACACAGTCGAA | (GAA)12 | 156 | (GAA)9 | 57.3 |
| 5 | IS18 | F-GGAAGATCTGGGTGATTGGA  R-GAGATTGTCTTGCAGCCTCA | (GGA)20 | 156 | (GGA)17 | 52.0 |
| 6 | IC20 | F-TACTGCATCAGCAAAATCAG  R-CCGTTAAGAAAAGGTATACGG | (TTTA)7 | 198 | (TTTA)7 | 56.2 |
| 7 | IC75 | F-GTTCACCGATGTCTGAGTGTTG  R-TTTCCGCTCCCCAGTACTTA | (TAGA)6 | 153 | (TAGA)6 | 55.2 |
| 8 | IC75 | F-TCCGTCTCGACAATACAGCA  R-AGATCGCAATACGGCAGCTA | (ATTC)5 | 190 | (ATTC)4 | 53.1 |
| 9 | IC8 | F-CTCTCCGCATCTTCCATCTT  R-CGGCAATGTAGGGGAAAA | (GT)15 | 237 | (GT)11 | 51.4 |
| 10 | IC8 | F-GTGGAAAGCGTGAAAACTCC  R-AACTTTCAACCCTCCCTTCC | (TG)10 | 191 | (TG)7 | 58.2 |
| 11 | IC8 | F-AGCTCTGCTCGGCTTTTCTT  R-CAATGGATTCTCGGCTGTCT | (TG)10 | 180 | (TG)10 | 54.0 |
| 12 | IC10 | F-CCTCACTCTTTTCGCTCCAA  R-TTGTCTGCTTGCTTGTCTGG | (AG)12 | 165 | (AG)12 | 60.4 |
| 13 | IC17 | F-ATCTTGGCTTCTGCTCTGGA  R-CATCGCATTTGTGGGTTG | (TC)18 | 203 | (TC)15 | 47.0 |
| 14 | IC21 | F-CTGTCTCAAATCCACCGACA  R-TTATGCCAGCACGGCTTT | (AG)10 | 182 | (AG)10 | 56.3 |
| 15 | IC21 | F-GACGACGATGGGCAAATAA  R-GCGAGACGTGCAGAGCAATTA | (TG)10 | 175 | (TG)9 | 54.2 |
| 16 | IC27 | F-TCATGGGCGAAAGGGTAA  R-ACGTGATGCTGAGGATTGTG | (CA)18 | 197 | (CA)6 | 54.0 |
| 17 | IC46 | F-CGTCATGGTGGCAAATCA  R-AACAACGGCTCAACAGTCCT | (CT)13 | 152 | (CT)8 | 51.0 |
| 18 | IC50 | F-CCTGCATCCAGGACATTTCT  R-GGGACATTGATGGAAAGTGG | (CT)11 | 158 | (CT)8 | 54.3 |
| 19 | IC51 | F-TTGCACCCAAGTTGACCA  R-CAAAAGCTCTGGCTGTGTTG | (TC)11 | 198 | (AG)9 | 54.2 |
| 20 | IC66 | F-TTTCTCCACCTCTCGTTTCG  R-TCCATCTCGCTCATCTTGTG | (GA)11 | 210 | (GA)7 | 59.6 |
| 21 | IC68 | F-GTGATGCAAGCCTCTGAT  R-TAGGAAATGGGTGAGAGGACGAA | (GT)11 | 161 | (GT)5 | 54.4 |
| 22 | IC74 | F-AAGATCCCGAAAGAAGGAT  R-CACGACAAATTGCATGTCTA | (TC)16 | 176 | (TC)14 | 49.0 |
